# Supplementary material for: Protein Dimerization via Tyr Residues: Highlight of a Slow Process with Co-Existence of Numerous Intermediates and Final Products
Source: MDPI journal article supplement (doi:10.3390/ijms23031174), 2022-01-21
Supplement: s1 [file s1]

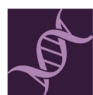

## Supplementary Materials

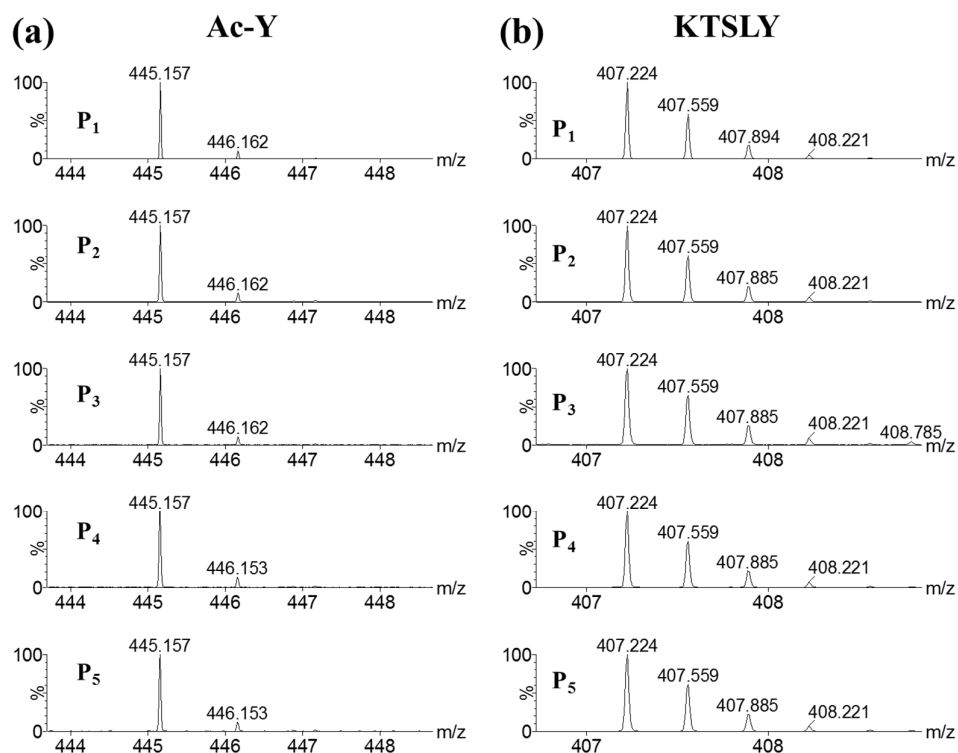

**Figure S1:** Oxidation of Ac-Y (a) and KTSLY peptide (b) in H<sub>2</sub>O. Full scan MS spectra extracted at RT of dimers.

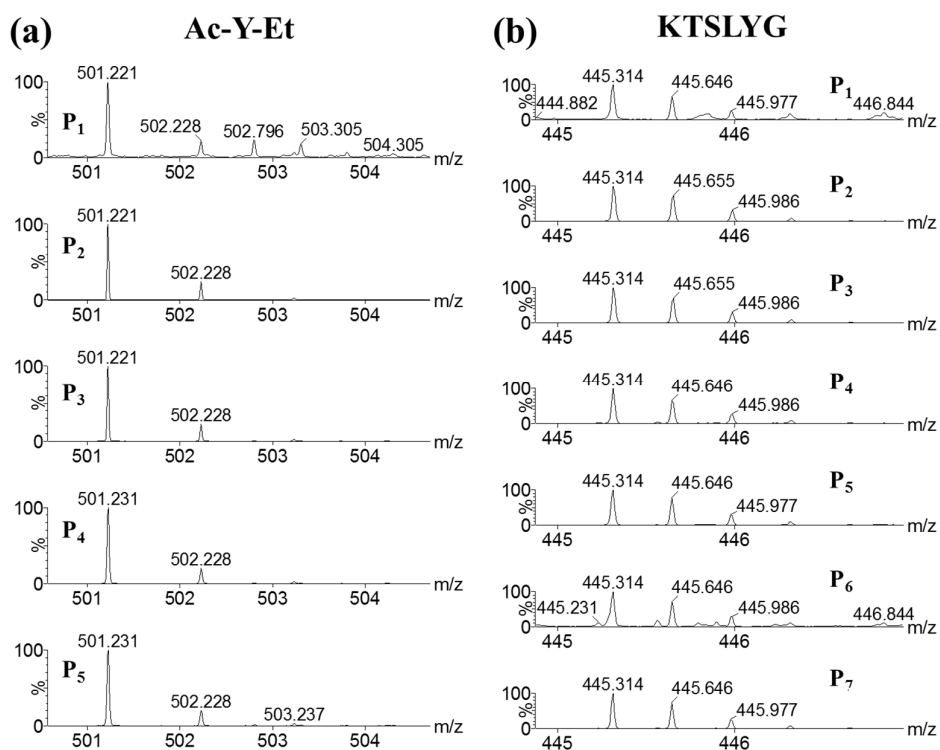

**Figure S2:** Oxidation of Ac-Y-Et (a) and KTSLYG peptide (b) in H<sub>2</sub>O. Full scan MS spectra extracted at RT of dimers.

| Species                                                                             | Monoisotopic<br><i>m/z</i> | Dimer                                                                     |                                                         |                                                         |
|-------------------------------------------------------------------------------------|----------------------------|---------------------------------------------------------------------------|---------------------------------------------------------|---------------------------------------------------------|
|                                                                                     |                            | $[M + xH]_{dimer}^{x+} = \frac{2 * M_{monomer} - 2 * M(H) + x * M(H)}{x}$ |                                                         |                                                         |
|                                                                                     | Monomer<br>(theoretical)   | [M+H] <sup>+</sup><br>(theoretical)                                       | Selected [M+xH] <sup>x+</sup><br>(theoretical)          | Detected [M+xH] <sup>x+</sup><br>(experimental)         |
| Ac-Y                                                                                | 223.085                    | 445.161 <sup>+</sup>                                                      | 445.161 <sup>+</sup>                                    | 445.157 <sup>+</sup>                                    |
| Ac-Y-Et                                                                             | 251.116                    | 501.224 <sup>+</sup>                                                      | 501.224 <sup>+</sup>                                    | 501.223 <sup>+</sup>                                    |
| KTSLY peptide                                                                       | 611.341                    | 1219.657 <sup>+</sup>                                                     | 407.224 <sup>3+</sup>                                   | 407.235 <sup>3+</sup>                                   |
| KTSLYG peptide                                                                      | 668.362                    | 1333.700 <sup>+</sup>                                                     | 445.238 <sup>3+</sup>                                   | 445.314 <sup>3+</sup>                                   |
| <sup>168</sup> KTSLY <sup>172</sup> in CEN2                                         | 611.341                    | 1219.657 <sup>+</sup>                                                     | 610.332 <sup>2+</sup><br>[M+2H+1] 610.836 <sup>2+</sup> | 610.336 <sup>2+</sup><br>[M+2H+1] 610.832 <sup>2+</sup> |
| <sup>92</sup> V-R <sup>107</sup> in CaM                                             | 1753.864                   | 3506.719 <sup>+</sup>                                                     | 702.150 <sup>5+</sup>                                   | 702.144 <sup>5+</sup>                                   |
| <sup>92</sup> V-R <sup>107</sup> in CaM<br><sup>128</sup> E-K <sup>149</sup> in CaM | 1753.864<br>2489.073       | 4241.928 <sup>+</sup>                                                     | 849.191 <sup>5+</sup>                                   | 849.178 <sup>5+</sup>                                   |

**Table S1:** Theoretical and experimental *m/z* of considered species.

|                |     | P <sub>1</sub> | P <sub>2</sub> | P <sub>3</sub> | P <sub>4</sub> | P <sub>5</sub> | P <sub>6</sub> | P <sub>7</sub> |
|----------------|-----|----------------|----------------|----------------|----------------|----------------|----------------|----------------|
| <b>Ac-Y</b>    | T0  | 0.03           | 0.70           | 0.94           | -0.01          | ND             | -              | -              |
|                | T48 | -0.01          | ND             | ND             | -0.02          | <b>2.24</b>    | -              | -              |
| <b>KTSLY</b>   | T0  | 0.09           | 0.87           | 0.75           | 0.09           | 1.35           | -              | -              |
|                | T5  | 0.05           | 1.59           | 1.64           | 0.07           | <b>3.26</b>    | -              | -              |
|                | T48 | 0.10           | ND             | ND             | 0.07           | <b>3.85</b>    | -              | -              |
| <b>Ac-Y-Et</b> | T0  | 0.86           | 0.39           | 1.56           | 0.01           | -0.04          | -              | -              |
|                | T48 | ND             | -0.03          | <b>2.70</b>    | 0.01           | <b>2.66</b>    | -              | -              |
| <b>KTSLYG</b>  | T0  | 0.06           | 0.70           | 1.83           | 0.14           | 1.44           | ND             | ND             |
|                | T72 | 0.01           | ND             | <b>3.49</b>    | 0.01           | <b>3.53</b>    | <b>3.44</b>    | <b>2.93</b>    |

**Table S2:** Average deuterium incorporation after H/D exchange for the different chromatographic peaks.
